# Supplementary material
Source: publisher figshare collection journal article supplement (https://tandf.figshare.com/ndownloader/files/22728608)

**Supplementary File**

**
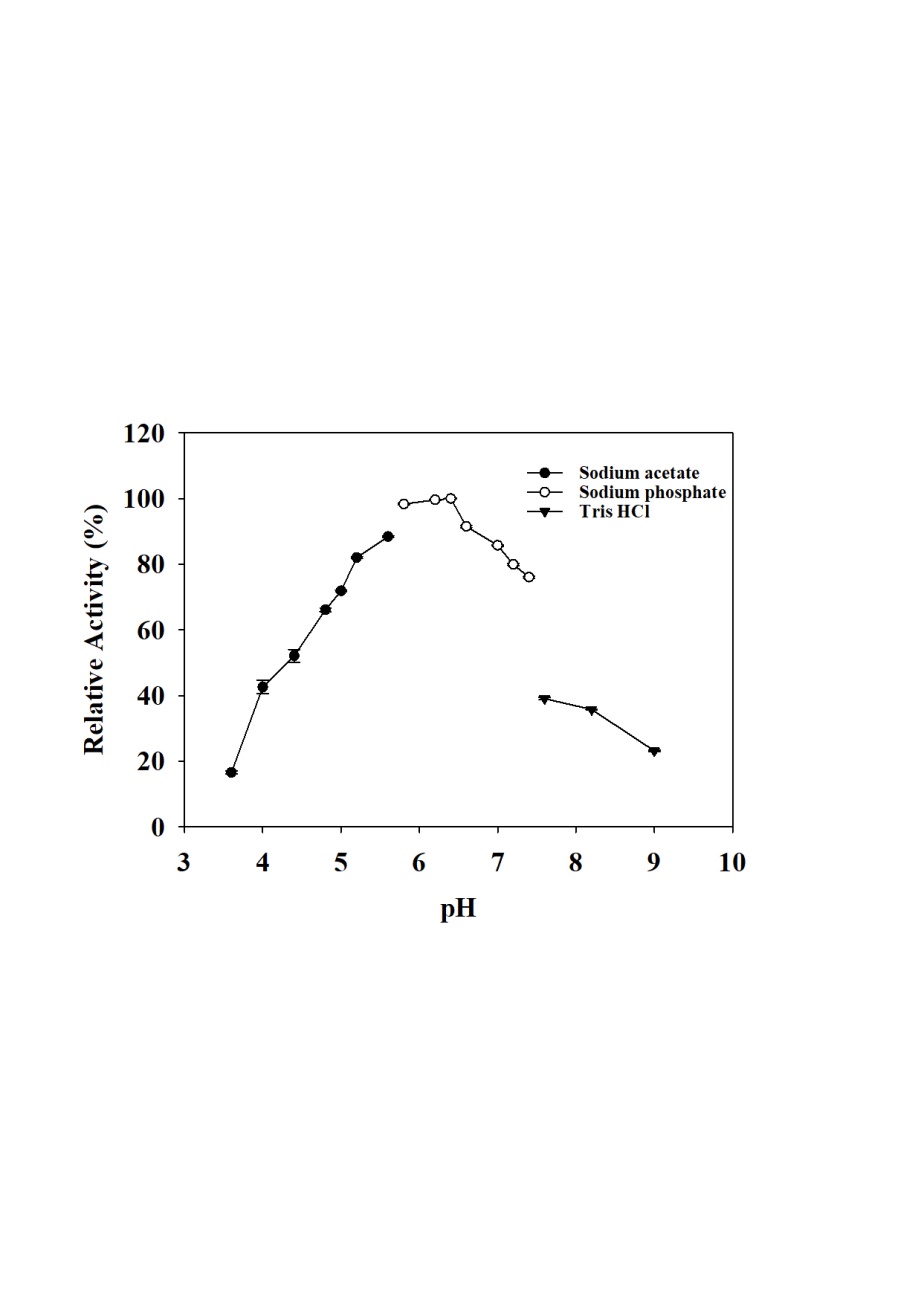
**

**Fig. S1** pH stability of cellobiohydrolase, *Ct*CBH5A.

Supplement: Supplementary file 1 [file 22728608]
